# Supplementary material for: Trained volunteers to support chronically ill, multimorbid elderly between hospital and domesticity – a systematic review of one-on-one-intervention types, effects, and underlying training concepts
Source: PubMed Central journal article supplement (PMC6498473; doi:10.1186/s12877-019-1130-2), 2019-05-02
Supplement: 12877_2019_1130_MOESM2_ESM.pdf [file 12877_2019_1130_MOESM2_ESM.pdf]

## Additional file 2

### Search strategy for Medline (PubMed)

- #1 (Aged[Title/Abstract])
- #2 (Aged[MeSH])
- #3 (aged, 80 and over[Title/Abstract])
- #4 (aged, 80 and over[MeSH])
- #5 (elderly[Title/Abstract])
- #6 (geriatric patients[Title/Abstract])
- #7 (multiple chronic conditions[MeSH])
- #8 (multiple chronic conditions[Title/Abstract])
- #9 (chronic disease[MeSH])
- #10 (chronic disease[Title/Abstract])
- #11 (chronic[Title/Abstract])
- #12 (ongoing condition [Title/Abstract])
- #13 (persistent illness\*[Title/Abstract])
- #14 (persistent disease\*[Title/Abstract])
- #15 (long term illness\*[Title/Abstract])
- #16 (long term disease\*[Title/Abstract])
- #17 (ongoing health condition [Title/Abstract])
- #18 (health impairments[Title/Abstract])
- #19 (degenerative [Title/Abstract])
- #20 (degenerative disease[Title/Abstract])
- #21 (neurodegenerative [Title/Abstract])
- #22 (neurodegenerative diseases [Title/Abstract])
- #23 (neurodegenerative diseases [MeSH])
- #24 (Comorbidity[MeSH])
- #25 (Comorbidity[Title/Abstract])
- #26 (comorbid[Title/Abstract])

- #27 (Multimorbid[Title/Abstract])
- #28 (multimorbidity[Title/Abstract])
- #29 (dementia[MeSH])
- #30 (dementia[Title/Abstract])
- #31 (alzheimer disease[Title/Abstract])
- #32 (alzheimer disease[MeSH])
- #33 (diabetes mellitus[Title/Abstract])
- #34 (diabetes mellitus[MeSH])
- #35 (diabetes mellitus, type 2[MeSH])
- #36 (diabetes mellitus type 2[Title/Abstract])
- #37 (Diabetes[Title/Abstract])
- #38 (depressive disorder[Title/Abstract])
- #39 (depressive disorder[MeSH])
- #40 (depressive disorder, major[MeSH])
- #41 (major depression[Title/Abstract])
- #42 (frail[Title/Abstract])
- #43 (frailty[Title/Abstract])
- #44 (ambulatory care[MeSH])
- #45 (ambulatory care[Title/Abstract])
- #46 (domestic[Title/Abstract])
- #47 (community[Title/Abstract])
- #48 (community service[Title/Abstract])
- #49 (home care setting\*[Title/Abstract])
- #50 (homecare setting\*[Title/Abstract])
- #51 (home-based[Title/Abstract])
- #52 (home rehabilitation[Title/Abstract])
- #53 (home health aides[Title/Abstract])
- #54 (home health care[Title/Abstract])
- #55 (home care services [Title/Abstract])

#56 (home care services[MeSH])  
#57 (outpatients[Title/Abstract])  
#58 (outpatients[MeSH])  
#59 (outpatient service[Title/Abstract])  
#60 (hospitals[MeSH])  
#61 (hospitals[Title/Abstract])  
#62 (Clinic[Title/Abstract])  
#63 (Emergency service, hospital[MeSH])  
#64 (Emergency service, psychiatric[MeSH])  
#65 (emergency care[Title/Abstract])  
#66 (patient discharge[MeSH])  
#67 (patient discharge[Title/Abstract])  
#68 (hospital discharge[Title/Abstract])  
#69 (Aftercare[Title/Abstract])  
#70 (Aftercare[MeSH])  
#71 (elder care [Title/Abstract])  
#72 (health services for the aged[MeSH])  
#73 (health services for the aged[Title/Abstract])  
#74 (volunteers[MeSH])  
#75 (hospital volunteers[MeSH])  
#76 (hospital volunteers[Title/Abstract])  
#77 (lay help\*[Title/Abstract])  
#78 (family companion\*[Title/Abstract])  
#79 (companion model\*[Title/Abstract])  
#80 (care companion\*[Title/Abstract])  
#81 (Lay led[Title/Abstract])  
#82 (Lay leader\*[Title/Abstract])  
#83 (Lay expert\*[Title/Abstract])  
#84 (Lay worker\*[Title/Abstract])

#85 (lay health worker\*[Title/Abstract])  
#86 (Lay person\*[Title/Abstract])  
#87 (Lay advisor\*[Title/Abstract])  
#88 (lay health advisor\*[Title/Abstract])  
#89 (Lay educator\*[Title/Abstract])  
#90 (Lay health educator\*[Title/Abstract])  
#91 (Lay tutor\*[Title/Abstract])  
#92 (Lay instructor\*[Title/Abstract])  
#93 (Layperson[Title/Abstract])  
#94 (voluntary-worker\*[Title/Abstract])  
#95 (volunteer worker\*[Title/Abstract])  
#96 (Trained volunteer\*[Title/Abstract])  
#97 (volunteer\* aide\*[Title/Abstract])  
#98 (Voluntary work\*[Title/Abstract])  
#99 (Voluntary care\*[Title/Abstract])  
#100 (Voluntary service\*[Title/Abstract])  
#101 (Voluntary support\*[Title/Abstract])  
#102 (Voluntary involvement[Title/Abstract])  
#103 (Voluntary help\*[Title/Abstract])  
#104 (Voluntary counsel\*[Title/Abstract])  
#105 (Voluntary staff[Title/Abstract])  
#106 (Voluntary provide\*[Title/Abstract])  
#107 (Voluntary program\*[Title/Abstract])  
#108 (Voluntary sector\*[Title/Abstract])  
#109 (Voluntary health agencies[MeSH])  
#110 (Voluntary health agencies[Title/Abstract])  
#111 OR/ #1-#43  
#112 OR/ #44-#73  
#113 OR/ #74-#110

#114 AND/ #111-#113  
#115 #114, Limiter Publication Date: 2002/01/01-2017-04-01  
#116 #115, Limiter Language: English, German  
#117 #116, Limiter Aged: 65+years
